# Supplementary material for: Thanksgiving to Yeast, the HMGB Proteins History from Yeast to Cancer
Source: MDPI journal article supplement (doi:10.3390/microorganisms11040993), 2023-04-11
Supplement: s1 [file s1]

**Supplementary S1.-** Alignment of sequences used to build up Figure 2

```
>Ubf1HMG-box3
TKPPPNSSYSLYCAELMAN--MKDVPST-----
ERMVLCSQQWKLLSQKEKDAYHKKCDQKKKDYEVELLRFL
>Ubf1HMG-box6
KKPPMNGYQKFSQELLSNGELNHLPLK-----
ERMVEIGSRWQRISQSQKEHYKKLAEEQQKQYKVHLDLWV
>Ubf1HMG-box2
PEKPKTPQQWLWYTHEKKV-YLKVRPDA-----
TTKEVKDSLQKQWSQLSDKKRLKWIHKALEQRKEYEEIMRDYI
>Ubf1HMG-box5
PESPKRAEEIWQQSVIGD-YLARFKND-----RV-
KALKAMEMTWNNEKKEKLMWIKKAAEDQKRYERELSEMR
>Hmo1
PKKPLTVFFAYSAYVRQE-
LREDRQKAGLPPLSSTEITQEISKWKELSDNEKEKWKQAYNVELENYQREKSKYL
>Ubf1HMG-box1
PKKPLTPYFRFFMEKRAK-YAKLHPM-----
SNLDLTKILSKKYKELPEKKMKYIQDFQREKQEFERNLARFR
>Ixr1HMG-box1
PKRPSSAYFLFSMSIRNE-LLQQFPEA-----
KVPELSKLASARWKELTDDQKKPFYEEFRTNWEKYRVVRDAYE
>Rox1
IPRPKNAFILFRQHYHRI-
LIDEWTAQGVEIPHNSNISKIIGTKWKGLQPEDKAHWENLAEKEKLEHERKYPEYK
>Sox30
VKRPMNAFMVWARIHRPA-LAKANPAA-----
NNAEISVQLGLEWNKLSEEQKKPYDEAQKIKEKHREEFPGWV
>Sox5
IKRPMNAFMVWAKDERRK-ILQAFPD-----
HNSNISKILGSRWKAMTNLEKQPYEEQARLSKQHLEKYPDYK
>Sox13
IKRPMNAFMVWAKDERRK-ILQAFPD-----
HNSISKILGSRWKSMTNQEKPYYEEQARLSRQHLEKYPDYK
>Sox6
IKRPMNAFMVWAKDERRK-ILQAFPD-----
HNSNISKILGSRWKSMSNQEKPYYEEQARLSKIHLEKYPNYK
>SRY
VKRPMNAFIVWSRDQRRK-MALENPRM-----
RNSEISKQLGYQWKMLTEAEKWPFQEAQKLQAMHREKYPNYK
>Sox15
VKRPMNAFMVWSSAQRRQ-MAQQNPKM-----
HNSEISKRLGAQWKLLDEDEKRPFVEEAKRLRARHLRDYPDYK
>Sox14
IKRPMNAFMVWSRGQRRK-MAQENPKM-----
HNSEISKRLGAEWKLLSEAEKRPYIDEAKRLRAQHMKEHPDYK
>Sox21
VKRPMNAFMVWSRAQRRK-MAQENPKM-----
HNSEISKRLGAEWKLLTESEKRPFIDEAKRLRAMHMKEHPDYK
>Sox1
VKRPMNAFMVWSRGQRRK-MAQENPKM-----
HNSEISKRLGAEWKVMSEAEKRPFIDEAKRLRALHMKEHPDYK
>Sox2
VKRPMNAFMVWSRGQRRK-MAQENPKM-----
HNSEISKRLGAEWKLLSETEKRPFIDEAKRLRALHMKEHPDYK
>Sox12
```

IKRPMNAFMVWSQHERRK-IMDQWPDM-----  
HNAEISKRLGRRWQLLQDSEKIPFVREAERLRLKHMADYPDYK  
>Sox4  
IKRPMNAFMVWSQIERRK-IMEQSPDM-----  
HNAEISKRLGKRWKLKDSKIPFIREAERLRLKHMADYPDYK  
>Sox11  
IKRPMNAFMVWSKIERRK-IMEQSPDM-----  
HNAEISKRLGKRWKLKDSKIPFIREAERLRLKHMADYPDYK  
>Sox10  
VKRPMNAFMVWAQAARRK-LADQYPHL-----  
HNAELSKTLGKLWRLNLSKRPFIEEAERLRMQHKKDHPDYK  
>Sox9  
VKRPMNAFMVWAQAARRK-LADQYPHL-----  
HNAELSKTLGKLWRLNLSKRPFVVEEAERLRVQHKKDHPDYK  
>Sox8  
VKRPMNAFMVWAQAARRK-LADQYPHL-----  
HNAELSKTLGKLWRLNLSKRPFVVEEAERLRVQHKKDHPDYK  
>Sox7  
IRRPMAFMVWAKDERKR-LAVQNPDL-----  
HNAELSKMLGKSWKALTLSQKRPYVDEAERLRLQHMQDYPNYK  
>Sox18  
IRRPMAFMVWAKDERKR-LAQQNPDL-----  
HNAVLKMLGKAWKELNAAEKRPFVVEEAERLRVQHLDHPNYK  
>Sox17  
IRRPMAFMVWAKDERKR-LAQQNPDL-----  
HNAELSKMLGKSWKALTLAEKRPFVVEEAERLRVQHMDHPNYK  
>Nhp10  
PKRPTNAYLLYCEMNKER--IRQNGSL-----  
DVTRDLAEGWKNLNEQDRKPYYKLYSEDRERYQMEMEIYN  
>Hmgb4HMG-box1  
PKANVSSYVHFLNLYRNK-FKEQQPNT---  
YVGFEKFSRKCEKWSRISKHEKAKYEALAKLDKARYQEEMMNYV  
>Hmgb2HMG-box1  
PKGKMSAYAFFVQTCREE-HKKKNPEV---  
PVNFAEFSSKKCSERWKTMSGKEKSKFDEMAKADKVRDREMMDYG  
>Hmgb1HMG-box1  
PRGKMSSYAFFVQTCREE-HKKKHPPDA---  
SVNFSEFSSKKCSERWKTMSAKEKSKFEDMAKADKARYEREMKTYI  
>Hmgb3HMG-box1  
PRGKMSSYAFFVQTCREE-HKKKHPPDS---  
SVNFAEFSSKKCSERWKTMSAKEKSKFEDMAKSDKARYDREMKNYV  
>Ubf1HMG-box4  
PKRPVSAMFIFSEEKRRQ-LQEERPEL-----  
SESELTRLLARMWNDLSEKKKAKYKAREAALKAQSERKPGGER  
>Nhp6A  
PKRALSAYMFFANENRDI-VRSENPDI-----  
TFGQVGKKLGEKWKALTPEEKQPYEAKAQADKKRYESEKELYN  
>Nhp6b  
PKRGLSAYMFFANENRDI-VRSENPDI-----  
TFGQVGRIILGERWKALTAEEKQPYESKAQADKKRYESEKELYN  
>Hmgb4HMG-box2  
PRRPPSSFLFCQDHYAQ-LKRENPNW-----  
SVVQVAKATGKMWSTATDLEKHPYEQRVALLRAKYFEELELYR  
>Hmgb2HMG-box2  
PKRPPSGFFLFCSEFRPK-IKSTNPGI-----  
SIGDVAKKLGEMWNNLNDSEKQPYITKAACKLKEYEKDVADYK  
>Hmgb3HMG-box2

PKRPPSAFFLFCSEHRPK-IKSEHPGL-----  
SIGDTAKKLGEMWSEQSAKDKQPYEQKAAKLKEYEKDIAAYR  
>Hmgb1HMG-box2  
PKRPPSAFFLFCSEYRPK-IKGEHPGL-----  
SIGDVAKKLGEMWNNTAADDKQPYEKKAACLKEYEKDIAAYR  
>Smce1  
PDKPLMPYMRYSRKVWDQ-VKASNPDL-----  
KLWEIGKIIGGMWRDLTDEEKQEYLNEYEAKEIEYNESMKAYH  
>TfamHMG-box1  
PKKPVSYYLRFSEQLPI-FKAQNPDA-----  
KTTELIRRIAQRWRELPDSKKKIYQDAYRAEWQVYKEEISRFK  
>TfamHMG-box2  
PKRPRSAYNVYVAERFQE-AKGDSPQ-----  
EKLKTVKENWKNLSDSEKELYIQHAKEDETRYHNEMKSWE  
>Abf2HMG-box1  
PKRPTSAYFLYLQDHRSQ-FVKENPTL-----  
RPAEISKIAGEKWQNLLEADIKEYISERKKLYSEYQKAKKEFD  
>Abf2HMG-box2  
PKKPAGPFIKYANEVRSQ-VFAQHPDK-----  
SQLDLMKIIGDKWQSLDQSIKDKYIQEYKKAIQEYNARYPLN-  
>Ixr1HMG-box2  
PKRPSGPFIQFTQEIRPT-VVKENPDK-----  
GLIEITKIIGERWRELDPAKKAEYTETYYKKRLKEWESCYPDEN

**Supplementary S2.**-Phylogeny analysis of HMG-boxes by the Neighbour-joining method (excluding gaps): Out-put results

```
(
(
(
(
(
Ubf1HMG-box3:0.31429,
Ubf1HMG-box6:0.33186)
:0.06548,
(
Ubf1HMG-box2:0.35106,
Ubf1HMG-box5:0.38423)
:0.04910)
:0.01635,
(
(
Nhp10:0.36012,
(
(
Nhp6A:0.04762,
Nhp6b:0.05383)
:0.24876,
(
Hmgb4HMG-box2:0.30762,
(
Hmgb2HMG-box2:0.11615,
(
Hmgb3HMG-box2:0.06252,
Hmgb1HMG-box2:0.06791)
:0.06501)
:0.14166)
:0.04109)
:0.01205)
:0.02018,
(
(
Hmgb4HMG-box1:0.27572,
(
Hmgb2HMG-box1:0.08951,
(
Hmgb1HMG-box1:0.04726,
Hmgb3HMG-box1:0.05133)
:0.05837)
:0.16794)
:0.07249,
TfamHMG-box2:0.31792)
:0.02652)
:0.00714)
:0.01112,
(
(
Rox1:0.35254,
(
Sox30:0.28078,
(
```

```
(
(
Sox5:0.02749,
Sox13:0.03048)
:0.00543,
Sox6:0.03805)
:0.19598,
(
(
SRY:0.17418,
(
Sox15:0.10556,
(
(
Sox14:0.02533,
(
Sox1:0.02739,
Sox2:0.01609)
:0.01815)
:0.00806,
Sox21:0.03904)
:0.06111)
:0.05771)
:0.04252,
(
(
Sox12:0.06447,
(
Sox4:0.02318,
Sox11:0.02030)
:0.03698)
:0.11600,
(
(
Sox10:0.02869,
(
Sox9:0.00903,
Sox8:0.00546)
:0.01479)
:0.13891,
(
Sox7:0.07344,
(
Sox18:0.05575,
Sox17:0.04570)
:0.02801)
:0.09388)
:0.02395)
:0.03482)
:0.00573)
:0.05736)
:0.03967)
:0.05347,
(
Abf2HMG-box1:0.30367,
(
Abf2HMG-box2:0.29943,
Ixr1HMG-box2:0.28881)
```

```
:0.04448)
:0.02431)
:0.01678)
:0.01063,
(
Hmo1:0.35338,
(
Ubf1HMG-box1:0.32325,
Ubf1HMG-box4:0.31443)
:0.03793)
:0.01375,
(
Ixr1HMG-box1:0.34981,
(
Smce1:0.31777,
TfamHMG-box1:0.31991)
:0.04150)
:0.00256);
```
